# Supplementary material for: Synthesis, Characterisation, andIn VitroAnticancer Activity of Curcumin Analogues Bearing Pyrazole/Pyrimidine Ring Targeting EGFR Tyrosine Kinase
Source: Hindawi journal article supplement (doi:10.1155/2013/239354), 2013-01-01
Supplement: f1 [file 239354.f1.pdf]

# Synthesis, characterisation and *in vitro* anticancer activity of curcumin analogues bearing pyrazole/pyrimidine ring targeting EGFR tyrosine kinase

Mohamed Jawed Ahsan<sup>1,\*</sup>, Habibullah Khalilullah<sup>2</sup>, Sabina Yasmin<sup>3</sup>, Surender Singh Jadav<sup>3</sup>,  
Jeyabalan Govindasamy<sup>2</sup>

<sup>1</sup>Department of Pharmaceutical Chemistry, Maharishi Arvind College of Pharmacy,  
Ambabari, Jaipur, Rajasthan 302 023, India

<sup>2</sup>Department of Pharmaceutical Chemistry, Alwar Pharmacy College, Alwar, Rajasthan 301  
030, India

<sup>3</sup>Department of Pharmaceutical Chemistry, Birla Institute of Technology, Mesra, Ranchi,  
Jharkhand 835 215, India

---

## Supplementary Materials

A series of 14, novel curcumin analogues has been synthesized. There were 10 tested compounds among 14 synthesized compounds, which showed potent anticancer activity in both one dose and 5-dose assays. The five dose assay for the compounds **8**, **10**, and **13** is described and given in the article in  $\mu M$  while for rest of the compounds (**1**, **2**, **3**, **5**, **6**, **11**, and **12**) the results of five dose assay can be found online as supplementary materials.

| National Cancer Institute Developmental Therapeutics Program |                        | NSC :763372/1               |                       | Units :Molar |                        | SSPL :0Y1V                   |  | EXP. ID :1202NS13 |  |
|--------------------------------------------------------------|------------------------|-----------------------------|-----------------------|--------------|------------------------|------------------------------|--|-------------------|--|
| Mean Graphs                                                  |                        | Report Date :April 25, 2012 |                       |              |                        | Test Date :February 21, 2012 |  |                   |  |
| Panel/Cell Line                                              | Log <sub>10</sub> GI50 | GI50                        | Log <sub>10</sub> TGI | TGI          | Log <sub>10</sub> LC50 | LC50                         |  |                   |  |
| Leukemia                                                     |                        |                             |                       |              |                        |                              |  |                   |  |
| CCRF-CEM                                                     | -6.67                  |                             | -6.07                 |              | >                      | -4.00                        |  |                   |  |
| HL-60(TB)                                                    | -6.50                  |                             | -6.05                 |              | >                      | -4.00                        |  |                   |  |
| K-562                                                        | -6.58                  |                             | -5.75                 |              | >                      | -4.00                        |  |                   |  |
| MOLT-4                                                       | -6.48                  |                             | -5.86                 |              | >                      | -4.00                        |  |                   |  |
| RPMI-8226                                                    | -6.63                  |                             | -6.17                 |              |                        |                              |  |                   |  |
| SR                                                           | -7.57                  |                             | -7.07                 |              | >                      | -4.00                        |  |                   |  |
| Non-Small Cell Lung Cancer                                   |                        |                             |                       |              |                        |                              |  |                   |  |
| A549/ATCC                                                    | -6.49                  |                             | -5.68                 |              |                        | -4.72                        |  |                   |  |
| EKVX                                                         | -6.17                  |                             | -5.42                 |              |                        | -4.43                        |  |                   |  |
| HOP-62                                                       | -6.27                  |                             | -5.73                 |              |                        | -5.34                        |  |                   |  |
| HOP-92                                                       | -6.50                  |                             | -5.79                 |              |                        | -4.76                        |  |                   |  |
| NCI-H226                                                     | -6.21                  |                             | -5.56                 |              |                        | -4.48                        |  |                   |  |
| NCI-H23                                                      | -6.53                  |                             | -5.72                 |              | >                      | -4.00                        |  |                   |  |
| NCI-H322M                                                    | -6.21                  |                             | -5.20                 |              |                        | -4.19                        |  |                   |  |
| NCI-H460                                                     | -6.48                  |                             | -5.86                 |              |                        | -4.68                        |  |                   |  |
| NCI-H522                                                     | -7.21                  |                             | -6.39                 |              |                        | -5.58                        |  |                   |  |
| Colon Cancer                                                 |                        |                             |                       |              |                        |                              |  |                   |  |
| COLO 205                                                     | -5.75                  |                             | -5.50                 |              |                        | -5.25                        |  |                   |  |
| HCC-2998                                                     | -6.19                  |                             | -5.23                 |              |                        | -4.57                        |  |                   |  |
| HCT-116                                                      | -6.51                  |                             | -5.98                 |              |                        |                              |  |                   |  |
| HCT-15                                                       | -6.44                  |                             | -4.98                 |              |                        | -4.21                        |  |                   |  |
| HT29                                                         | -6.54                  |                             | -6.15                 |              |                        | -5.47                        |  |                   |  |
| KM12                                                         | -6.53                  |                             | -5.82                 |              |                        | -5.21                        |  |                   |  |
| SW-620                                                       | -6.44                  |                             | -5.73                 |              |                        | -4.96                        |  |                   |  |
| CNS Cancer                                                   |                        |                             |                       |              |                        |                              |  |                   |  |
| SF-268                                                       | -6.25                  |                             | -5.32                 |              | >                      | -4.00                        |  |                   |  |
| SF-295                                                       | -6.16                  |                             | -5.35                 |              |                        | -4.51                        |  |                   |  |
| SF-539                                                       | -6.34                  |                             | -5.65                 |              |                        | -5.11                        |  |                   |  |
| SNB-19                                                       | -6.04                  |                             | -5.23                 |              |                        | -4.54                        |  |                   |  |
| SNB-75                                                       | -6.61                  |                             | -6.01                 |              |                        | -5.30                        |  |                   |  |
| U251                                                         | -6.38                  |                             | -5.77                 |              |                        | -5.28                        |  |                   |  |
| Melanoma                                                     |                        |                             |                       |              |                        |                              |  |                   |  |
| LOX IMVI                                                     | -6.71                  |                             | -5.86                 |              |                        | -5.20                        |  |                   |  |
| MALME-3M                                                     | -6.36                  |                             | -5.58                 |              |                        |                              |  |                   |  |
| M14                                                          | -6.61                  |                             | -5.89                 |              |                        | -5.32                        |  |                   |  |
| MDA-MB-435                                                   | -7.56                  |                             | -7.00                 |              |                        | -4.97                        |  |                   |  |
| SK-MEL-28                                                    | -6.30                  |                             | -5.39                 |              |                        | -4.65                        |  |                   |  |
| SK-MEL-5                                                     | -6.56                  |                             | -5.89                 |              |                        | -5.44                        |  |                   |  |
| UACC-257                                                     | -5.96                  |                             | -5.41                 |              |                        | -4.76                        |  |                   |  |
| UACC-62                                                      | -6.33                  |                             | -5.43                 |              | >                      | -4.00                        |  |                   |  |
| Ovarian Cancer                                               |                        |                             |                       |              |                        |                              |  |                   |  |
| IGROV1                                                       | -6.30                  |                             | -5.57                 |              | >                      | -4.00                        |  |                   |  |
| OVCAR-3                                                      | -6.33                  |                             | -5.43                 |              |                        | -4.49                        |  |                   |  |
| OVCAR-5                                                      | -5.48                  |                             | -5.03                 |              | >                      | -4.00                        |  |                   |  |
| OVCAR-8                                                      | -6.40                  |                             | -5.77                 |              |                        | -5.02                        |  |                   |  |
| NCI/ADR-RES                                                  | -6.61                  |                             | -5.10                 |              | >                      | -4.00                        |  |                   |  |
| SK-OV-3                                                      | -6.41                  |                             | -5.66                 |              |                        | -4.66                        |  |                   |  |
| Renal Cancer                                                 |                        |                             |                       |              |                        |                              |  |                   |  |
| 786-0                                                        | -6.34                  |                             | -5.76                 |              |                        | -5.29                        |  |                   |  |
| A498                                                         | -6.31                  |                             | -5.68                 |              |                        | -5.22                        |  |                   |  |
| ACHN                                                         | -6.43                  |                             | -4.91                 |              |                        | -4.09                        |  |                   |  |
| CAKI-1                                                       | -6.70                  |                             | -6.12                 |              | >                      | -4.00                        |  |                   |  |
| RXF 393                                                      | -6.48                  |                             | -6.09                 |              |                        | -5.42                        |  |                   |  |
| SN12C                                                        | -6.41                  |                             | -4.80                 |              | >                      | -4.00                        |  |                   |  |
| TK-10                                                        | -6.29                  |                             | -5.56                 |              |                        | -4.72                        |  |                   |  |
| UO-31                                                        | -6.64                  |                             | -5.91                 |              |                        |                              |  |                   |  |
| Prostate Cancer                                              |                        |                             |                       |              |                        |                              |  |                   |  |
| PC-3                                                         | -6.50                  |                             | -5.75                 |              |                        | -4.91                        |  |                   |  |
| DU-145                                                       | -6.27                  |                             | -5.74                 |              |                        | -5.30                        |  |                   |  |
| Breast Cancer                                                |                        |                             |                       |              |                        |                              |  |                   |  |
| MCF7                                                         | -6.54                  |                             | -5.85                 |              |                        | -5.32                        |  |                   |  |
| MDA-MB-231/ATCC                                              | -6.12                  |                             | -4.87                 |              | >                      | -4.00                        |  |                   |  |
| HS 578T                                                      | -7.38                  |                             | -6.51                 |              |                        | -4.09                        |  |                   |  |
| BT-549                                                       | -6.52                  |                             | -5.42                 |              | >                      | -4.00                        |  |                   |  |
| T-47D                                                        | -6.00                  |                             | -5.58                 |              |                        | -5.16                        |  |                   |  |
| MID                                                          | -6.45                  |                             | -5.69                 |              |                        | -4.65                        |  |                   |  |
| Delta                                                        | 1.12                   |                             | 1.38                  |              |                        | 0.93                         |  |                   |  |
| Range                                                        | 2.09                   |                             | 2.27                  |              |                        | 1.58                         |  |                   |  |

| National Cancer Institute Developmental Therapeutics Program |                        |      |                       | NSC :757924/1                   |                        | Units :Molar |  | SSPL :0Y1V                 |  | EXP. ID :1108RS99 |  |
|--------------------------------------------------------------|------------------------|------|-----------------------|---------------------------------|------------------------|--------------|--|----------------------------|--|-------------------|--|
| Mean Graphs                                                  |                        |      |                       | Report Date :September 27, 2011 |                        |              |  | Test Date :August 08, 2011 |  |                   |  |
| Panel/Cell Line                                              | Log <sub>10</sub> GI50 | GI50 | Log <sub>10</sub> TGI | TGI                             | Log <sub>10</sub> LC50 | LC50         |  |                            |  |                   |  |
| Leukemia                                                     |                        |      |                       |                                 |                        |              |  |                            |  |                   |  |
| CCRF-CEM                                                     | -6.52                  |      | > -4.00               |                                 | > -4.00                |              |  |                            |  |                   |  |
| HL-60(TB)                                                    | -6.54                  |      | -5.98                 |                                 | > -4.00                |              |  |                            |  |                   |  |
| MOLT-4                                                       | -6.38                  |      | -5.24                 |                                 | > -4.00                |              |  |                            |  |                   |  |
| RPMI-8226                                                    | -6.46                  |      | -5.56                 |                                 | > -4.00                |              |  |                            |  |                   |  |
| SR                                                           | -7.21                  |      | > -4.00               |                                 | > -4.00                |              |  |                            |  |                   |  |
| Non-Small Cell Lung Cancer                                   |                        |      |                       |                                 |                        |              |  |                            |  |                   |  |
| A549/ATCC                                                    | -6.15                  |      | -4.97                 |                                 | -4.39                  |              |  |                            |  |                   |  |
| EKVX                                                         | -5.82                  |      | -4.93                 |                                 | -4.12                  |              |  |                            |  |                   |  |
| HOP-62                                                       | -6.27                  |      | -5.72                 |                                 | -5.26                  |              |  |                            |  |                   |  |
| HOP-92                                                       | -5.66                  |      | -5.14                 |                                 | > -4.00                |              |  |                            |  |                   |  |
| NCI-H226                                                     | -5.73                  |      | -5.15                 |                                 | -4.52                  |              |  |                            |  |                   |  |
| NCI-H23                                                      | -6.47                  |      | -5.86                 |                                 |                        |              |  |                            |  |                   |  |
| NCI-H322M                                                    | -6.11                  |      | -5.03                 |                                 | -4.31                  |              |  |                            |  |                   |  |
| NCI-H460                                                     | -6.50                  |      | -5.67                 |                                 | > -4.00                |              |  |                            |  |                   |  |
| NCI-H522                                                     | -6.67                  |      | -6.10                 |                                 | -4.29                  |              |  |                            |  |                   |  |
| Colon Cancer                                                 |                        |      |                       |                                 |                        |              |  |                            |  |                   |  |
| COLO 205                                                     | -5.69                  |      | -5.45                 |                                 | -5.21                  |              |  |                            |  |                   |  |
| HCC-2998                                                     | -5.82                  |      | -5.12                 |                                 | -4.49                  |              |  |                            |  |                   |  |
| HCT-116                                                      | -6.44                  |      | -5.73                 |                                 | -4.44                  |              |  |                            |  |                   |  |
| HCT-15                                                       | -6.34                  |      | -4.93                 |                                 | > -4.00                |              |  |                            |  |                   |  |
| HT29                                                         | -5.60                  |      | -5.20                 |                                 | > -4.00                |              |  |                            |  |                   |  |
| KM12                                                         | -6.47                  |      | -5.84                 |                                 | -4.92                  |              |  |                            |  |                   |  |
| SW-620                                                       | -6.35                  |      | -5.60                 |                                 | > -4.00                |              |  |                            |  |                   |  |
| CNS Cancer                                                   |                        |      |                       |                                 |                        |              |  |                            |  |                   |  |
| SF-268                                                       | -6.29                  |      | -5.44                 |                                 | -4.54                  |              |  |                            |  |                   |  |
| SF-295                                                       | -5.80                  |      | -4.94                 |                                 | > -4.00                |              |  |                            |  |                   |  |
| SF-539                                                       | -6.32                  |      | -5.65                 |                                 | -5.08                  |              |  |                            |  |                   |  |
| SNB-19                                                       | -6.19                  |      | -4.98                 |                                 | -4.35                  |              |  |                            |  |                   |  |
| SNB-75                                                       | -6.38                  |      | -5.59                 |                                 | > -4.00                |              |  |                            |  |                   |  |
| U251                                                         | -6.26                  |      | -5.26                 |                                 | -4.34                  |              |  |                            |  |                   |  |
| Melanoma                                                     |                        |      |                       |                                 |                        |              |  |                            |  |                   |  |
| LOX IMVI                                                     | -6.36                  |      | -5.62                 |                                 | > -4.00                |              |  |                            |  |                   |  |
| MALME-3M                                                     | -6.22                  |      | -5.50                 |                                 | -4.70                  |              |  |                            |  |                   |  |
| M14                                                          | -6.42                  |      | -5.82                 |                                 | -4.75                  |              |  |                            |  |                   |  |
| MDA-MB-435                                                   | -6.87                  |      | -6.43                 |                                 | -5.97                  |              |  |                            |  |                   |  |
| SK-MEL-2                                                     | -6.42                  |      | -5.71                 |                                 | > -4.00                |              |  |                            |  |                   |  |
| SK-MEL-28                                                    | -5.94                  |      | -5.34                 |                                 | -4.59                  |              |  |                            |  |                   |  |
| SK-MEL-5                                                     | -6.46                  |      | -5.87                 |                                 | -5.39                  |              |  |                            |  |                   |  |
| UACC-257                                                     | -5.85                  |      | -5.19                 |                                 | -4.53                  |              |  |                            |  |                   |  |
| UACC-62                                                      | -6.24                  |      | -5.62                 |                                 | -5.11                  |              |  |                            |  |                   |  |
| Ovarian Cancer                                               |                        |      |                       |                                 |                        |              |  |                            |  |                   |  |
| IGROV1                                                       | -6.23                  |      | -5.31                 |                                 | > -4.00                |              |  |                            |  |                   |  |
| OVCAR-3                                                      | -6.45                  |      | -5.98                 |                                 | -4.23                  |              |  |                            |  |                   |  |
| OVCAR-4                                                      | -6.01                  |      | -5.15                 |                                 | > -4.00                |              |  |                            |  |                   |  |
| OVCAR-5                                                      | -5.61                  |      | -5.12                 |                                 | > -4.00                |              |  |                            |  |                   |  |
| OVCAR-8                                                      | -6.13                  |      | -5.42                 |                                 | -4.15                  |              |  |                            |  |                   |  |
| NCI/ADR-RES                                                  | -6.44                  |      | -5.45                 |                                 | > -4.00                |              |  |                            |  |                   |  |
| SK-OV-3                                                      | -6.35                  |      | -5.77                 |                                 | -5.19                  |              |  |                            |  |                   |  |
| Renal Cancer                                                 |                        |      |                       |                                 |                        |              |  |                            |  |                   |  |
| 786-0                                                        | -6.28                  |      | -5.75                 |                                 | -5.32                  |              |  |                            |  |                   |  |
| A498                                                         | -5.73                  |      | -5.28                 |                                 | -4.72                  |              |  |                            |  |                   |  |
| ACHN                                                         | -6.28                  |      | -4.94                 |                                 | -4.32                  |              |  |                            |  |                   |  |
| CAKI-1                                                       | -6.43                  |      | -4.10                 |                                 | > -4.00                |              |  |                            |  |                   |  |
| RXF 393                                                      | -6.60                  |      | -6.12                 |                                 | -5.50                  |              |  |                            |  |                   |  |
| SN12C                                                        | -6.34                  |      | -4.67                 |                                 | > -4.00                |              |  |                            |  |                   |  |
| TK-10                                                        | -6.18                  |      | -5.21                 |                                 | -4.54                  |              |  |                            |  |                   |  |
| UO-31                                                        | -6.41                  |      | -5.37                 |                                 | -4.39                  |              |  |                            |  |                   |  |
| Prostate Cancer                                              |                        |      |                       |                                 |                        |              |  |                            |  |                   |  |
| PC-3                                                         | -6.38                  |      | -5.17                 |                                 | > -4.00                |              |  |                            |  |                   |  |
| DU-145                                                       | -6.42                  |      | -5.83                 |                                 | -5.16                  |              |  |                            |  |                   |  |
| Breast Cancer                                                |                        |      |                       |                                 |                        |              |  |                            |  |                   |  |
| MCF7                                                         | -6.36                  |      | -5.48                 |                                 | -4.40                  |              |  |                            |  |                   |  |
| MDA-MB-231/ATCC                                              | -6.20                  |      | -5.17                 |                                 | > -4.00                |              |  |                            |  |                   |  |
| HS 578T                                                      | -6.36                  |      |                       |                                 | > -4.00                |              |  |                            |  |                   |  |
| BT-549                                                       | -6.12                  |      | -5.34                 |                                 | > -4.00                |              |  |                            |  |                   |  |
| T-47D                                                        | -5.91                  |      | -5.30                 |                                 | -4.35                  |              |  |                            |  |                   |  |
| MDA-MB-468                                                   | -6.50                  |      | -5.63                 |                                 | -4.36                  |              |  |                            |  |                   |  |
|                                                              |                        |      |                       |                                 |                        |              |  |                            |  |                   |  |
| MID                                                          | -6.25                  |      | -5.37                 |                                 | -4.41                  |              |  |                            |  |                   |  |
| Delta                                                        | 0.96                   |      | 1.06                  |                                 | 1.56                   |              |  |                            |  |                   |  |
| Range                                                        | 1.61                   |      | 2.43                  |                                 | 1.97                   |              |  |                            |  |                   |  |
|                                                              |                        |      |                       |                                 |                        |              |  |                            |  |                   |  |

| National Cancer Institute Developmental Therapeutics Program |                        |      | NSC :757925/1                |       | Units :Molar           |       | SSPL :0Y1V               |  | EXP. ID :1106NS60 |  |  |
|--------------------------------------------------------------|------------------------|------|------------------------------|-------|------------------------|-------|--------------------------|--|-------------------|--|--|
| Mean Graphs                                                  |                        |      | Report Date :August 02, 2011 |       |                        |       | Test Date :June 06, 2011 |  |                   |  |  |
| Panel/Cell Line                                              | Log <sub>10</sub> GI50 | GI50 | Log <sub>10</sub> TGI        | TGI   | Log <sub>10</sub> LC50 | LC50  |                          |  |                   |  |  |
| Leukemia                                                     |                        |      |                              |       |                        |       |                          |  |                   |  |  |
| CCRF-CEM                                                     | -6.41                  |      | -5.31                        |       | >                      | -4.00 |                          |  |                   |  |  |
| HL-60(TB)                                                    | -6.43                  |      | -5.74                        |       | >                      | -4.00 |                          |  |                   |  |  |
| K-562                                                        | -6.43                  |      | -5.54                        |       | >                      | -4.00 |                          |  |                   |  |  |
| MOLT-4                                                       | -6.40                  |      | -5.28                        |       | >                      | -4.00 |                          |  |                   |  |  |
| RPMI-8226                                                    | -6.31                  |      | -5.48                        |       | >                      | -4.00 |                          |  |                   |  |  |
| SR                                                           | -6.53                  |      | -6.03                        |       | >                      | -4.00 |                          |  |                   |  |  |
| Non-Small Cell Lung Cancer                                   |                        |      |                              |       |                        |       |                          |  |                   |  |  |
| A549/ATCC                                                    | -5.62                  |      | -4.62                        |       | >                      | -4.00 |                          |  |                   |  |  |
| EKVX                                                         | -5.49                  |      | -4.60                        |       | >                      | -4.00 |                          |  |                   |  |  |
| HOP-62                                                       | -5.95                  |      | -5.09                        |       | >                      | -4.26 |                          |  |                   |  |  |
| HOP-92                                                       | -5.56                  |      | -5.09                        |       | >                      | -4.00 |                          |  |                   |  |  |
| NCI-H226                                                     | -5.56                  |      | -5.01                        |       | >                      | -4.00 |                          |  |                   |  |  |
| NCI-H23                                                      | -5.93                  |      | -5.20                        |       | >                      | -4.00 |                          |  |                   |  |  |
| NCI-H322M                                                    | -5.66                  |      | -4.94                        |       | >                      | -4.00 |                          |  |                   |  |  |
| NCI-H460                                                     | -6.21                  |      | -4.97                        |       | >                      | -4.00 |                          |  |                   |  |  |
| NCI-H522                                                     | -6.58                  |      | -5.86                        |       | >                      | -4.00 |                          |  |                   |  |  |
| Colon Cancer                                                 |                        |      |                              |       |                        |       |                          |  |                   |  |  |
| COLO 205                                                     | -5.72                  |      | -5.47                        |       |                        | -5.21 |                          |  |                   |  |  |
| HCC-2998                                                     | -5.65                  |      | -5.25                        |       |                        | -4.45 |                          |  |                   |  |  |
| HCT-116                                                      | -6.39                  |      | -4.98                        |       |                        | -4.34 |                          |  |                   |  |  |
| HCT-15                                                       | -6.24                  |      | -4.75                        |       | >                      | -4.00 |                          |  |                   |  |  |
| HT29                                                         | -5.60                  |      |                              |       | >                      | -4.00 |                          |  |                   |  |  |
| KM12                                                         | -6.35                  |      | -5.14                        |       | >                      | -4.00 |                          |  |                   |  |  |
| SW-620                                                       | -6.26                  |      | -4.99                        |       | >                      | -4.13 |                          |  |                   |  |  |
| CNS Cancer                                                   |                        |      |                              |       |                        |       |                          |  |                   |  |  |
| SF-268                                                       | -6.20                  |      | -5.13                        |       | >                      | -4.00 |                          |  |                   |  |  |
| SF-295                                                       | -5.58                  |      | -5.01                        |       | >                      | -4.00 |                          |  |                   |  |  |
| SF-539                                                       | -6.39                  |      | -5.49                        |       |                        | -4.05 |                          |  |                   |  |  |
| SNB-19                                                       | -5.93                  |      | -4.52                        |       | >                      | -4.00 |                          |  |                   |  |  |
| SNB-75                                                       | -6.10                  |      | -5.29                        |       |                        | -4.17 |                          |  |                   |  |  |
| U251                                                         | -6.18                  |      | -4.96                        |       | >                      | -4.00 |                          |  |                   |  |  |
| Melanoma                                                     |                        |      |                              |       |                        |       |                          |  |                   |  |  |
| LOX IMVI                                                     | -6.31                  |      | -5.33                        |       | >                      | -4.00 |                          |  |                   |  |  |
| MALME-3M                                                     | -6.12                  |      | -5.06                        |       | >                      | -4.00 |                          |  |                   |  |  |
| M14                                                          | -6.36                  |      | -5.10                        |       | >                      | -4.00 |                          |  |                   |  |  |
| MDA-MB-435                                                   | -6.64                  |      | -6.24                        |       | >                      | -4.00 |                          |  |                   |  |  |
| SK-MEL-2                                                     | -6.25                  |      | -5.47                        |       | >                      | -4.00 |                          |  |                   |  |  |
| SK-MEL-28                                                    | -6.01                  |      | -5.24                        |       |                        | -4.06 |                          |  |                   |  |  |
| SK-MEL-5                                                     | -6.40                  |      | -5.66                        |       |                        | -4.63 |                          |  |                   |  |  |
| UACC-257                                                     | -5.72                  |      | -5.03                        |       | >                      | -4.00 |                          |  |                   |  |  |
| UACC-62                                                      | -5.98                  |      | -5.40                        |       | >                      | -4.00 |                          |  |                   |  |  |
| Ovarian Cancer                                               |                        |      |                              |       |                        |       |                          |  |                   |  |  |
| IGROV1                                                       | -5.59                  |      | -4.66                        |       | >                      | -4.00 |                          |  |                   |  |  |
| OVCAR-3                                                      | -6.35                  |      | -5.56                        |       | >                      | -4.00 |                          |  |                   |  |  |
| OVCAR-4                                                      | -5.77                  |      | -5.14                        |       | >                      | -4.00 |                          |  |                   |  |  |
| OVCAR-8                                                      | -5.91                  |      | -5.34                        |       | >                      | -4.00 |                          |  |                   |  |  |
| NCI/ADR-RES                                                  | -6.31                  |      | -4.58                        |       | >                      | -4.00 |                          |  |                   |  |  |
| SK-OV-3                                                      | -6.13                  |      | -5.41                        |       |                        | -4.50 |                          |  |                   |  |  |
| Renal Cancer                                                 |                        |      |                              |       |                        |       |                          |  |                   |  |  |
| 786-0                                                        | -6.14                  |      | -5.09                        |       |                        | -4.14 |                          |  |                   |  |  |
| A498                                                         | -5.61                  |      | -5.22                        |       |                        | -4.69 |                          |  |                   |  |  |
| CAKI-1                                                       | -6.05                  |      | -4.39                        |       | >                      | -4.00 |                          |  |                   |  |  |
| RXF 393                                                      | -6.39                  |      | -5.76                        |       |                        |       |                          |  |                   |  |  |
| SN12C                                                        | -6.05                  |      | -4.33                        |       | >                      | -4.00 |                          |  |                   |  |  |
| TK-10                                                        | -5.54                  |      | -4.91                        |       | >                      | -4.00 |                          |  |                   |  |  |
| UO-31                                                        | -6.28                  |      | -5.46                        |       | >                      | -4.00 |                          |  |                   |  |  |
| Prostate Cancer                                              |                        |      |                              |       |                        |       |                          |  |                   |  |  |
| PC-3                                                         | -5.86                  |      | -5.06                        |       | >                      | -4.00 |                          |  |                   |  |  |
| DU-145                                                       | -5.71                  |      | -4.96                        |       |                        | -4.41 |                          |  |                   |  |  |
| Breast Cancer                                                |                        |      |                              |       |                        |       |                          |  |                   |  |  |
| MCF7                                                         | -6.39                  |      | -5.25                        |       |                        | -4.21 |                          |  |                   |  |  |
| MDA-MB-231/ATCC                                              | -5.59                  |      | >                            | -4.00 | >                      | -4.00 |                          |  |                   |  |  |
| HS 578T                                                      | -6.16                  |      | -5.21                        |       | >                      | -4.00 |                          |  |                   |  |  |
| BT-549                                                       | -6.02                  |      | -5.41                        |       | >                      | -4.00 |                          |  |                   |  |  |
| T-47D                                                        | -5.69                  |      | -5.15                        |       |                        | -4.32 |                          |  |                   |  |  |
| MDA-MB-468                                                   | -5.93                  |      | -5.35                        |       | >                      | -4.00 |                          |  |                   |  |  |
|                                                              |                        |      |                              |       |                        |       |                          |  |                   |  |  |
|                                                              |                        |      |                              |       |                        |       |                          |  |                   |  |  |
|                                                              |                        |      |                              |       |                        |       |                          |  |                   |  |  |
|                                                              |                        |      |                              |       |                        |       |                          |  |                   |  |  |
|                                                              |                        |      |                              |       |                        |       |                          |  |                   |  |  |
|                                                              |                        |      |                              |       |                        |       |                          |  |                   |  |  |
|                                                              |                        |      |                              |       |                        |       |                          |  |                   |  |  |
|                                                              |                        |      |                              |       |                        |       |                          |  |                   |  |  |
|                                                              |                        |      |                              |       |                        |       |                          |  |                   |  |  |
|                                                              |                        |      |                              |       |                        |       |                          |  |                   |  |  |
|                                                              |                        |      |                              |       |                        |       |                          |  |                   |  |  |
|                                                              |                        |      |                              |       |                        |       |                          |  |                   |  |  |
|                                                              |                        |      |                              |       |                        |       |                          |  |                   |  |  |
|                                                              |                        |      |                              |       |                        |       |                          |  |                   |  |  |
|                                                              |                        |      |                              |       |                        |       |                          |  |                   |  |  |
|                                                              |                        |      |                              |       |                        |       |                          |  |                   |  |  |
|                                                              |                        |      |                              |       |                        |       |                          |  |                   |  |  |
|                                                              |                        |      |                              |       |                        |       |                          |  |                   |  |  |
|                                                              |                        |      |                              |       |                        |       |                          |  |                   |  |  |
|                                                              |                        |      |                              |       |                        |       |                          |  |                   |  |  |
|                                                              |                        |      |                              |       |                        |       |                          |  |                   |  |  |
|                                                              |                        |      |                              |       |                        |       |                          |  |                   |  |  |
|                                                              |                        |      |                              |       |                        |       |                          |  |                   |  |  |
|                                                              |                        |      |                              |       |                        |       |                          |  |                   |  |  |
|                                                              |                        |      |                              |       |                        |       |                          |  |                   |  |  |
|                                                              |                        |      |                              |       |                        |       |                          |  |                   |  |  |
|                                                              |                        |      |                              |       |                        |       |                          |  |                   |  |  |
|                                                              |                        |      |                              |       |                        |       |                          |  |                   |  |  |
|                                                              |                        |      |                              |       |                        |       |                          |  |                   |  |  |
|                                                              |                        |      |                              |       |                        |       |                          |  |                   |  |  |
|                                                              |                        |      |                              |       |                        |       |                          |  |                   |  |  |
|                                                              |                        |      |                              |       |                        |       |                          |  |                   |  |  |
|                                                              |                        |      |                              |       |                        |       |                          |  |                   |  |  |
|                                                              |                        |      |                              |       |                        |       |                          |  |                   |  |  |
|                                                              |                        |      |                              |       |                        |       |                          |  |                   |  |  |
|                                                              |                        |      |                              |       |                        |       |                          |  |                   |  |  |
|                                                              |                        |      |                              |       |                        |       |                          |  |                   |  |  |
|                                                              |                        |      |                              |       |                        |       |                          |  |                   |  |  |
|                                                              |                        |      |                              |       |                        |       |                          |  |                   |  |  |
|                                                              |                        |      |                              |       |                        |       |                          |  |                   |  |  |
|                                                              |                        |      |                              |       |                        |       |                          |  |                   |  |  |
|                                                              |                        |      |                              |       |                        |       |                          |  |                   |  |  |
|                                                              |                        |      |                              |       |                        |       |                          |  |                   |  |  |
|                                                              |                        |      |                              |       |                        |       |                          |  |                   |  |  |
|                                                              |                        |      |                              |       |                        |       |                          |  |                   |  |  |
|                                                              |                        |      |                              |       |                        |       |                          |  |                   |  |  |
|                                                              |                        |      |                              |       |                        |       |                          |  |                   |  |  |
|                                                              |                        |      |                              |       |                        |       |                          |  |                   |  |  |
|                                                              |                        |      |                              |       |                        |       |                          |  |                   |  |  |
|                                                              |                        |      |                              |       |                        |       |                          |  |                   |  |  |
|                                                              |                        |      |                              |       |                        |       |                          |  |                   |  |  |
|                                                              |                        |      |                              |       |                        |       |                          |  |                   |  |  |
|                                                              |                        |      |                              |       |                        |       |                          |  |                   |  |  |
|                                                              |                        |      |                              |       |                        |       |                          |  |                   |  |  |
|                                                              |                        |      |                              |       |                        |       |                          |  |                   |  |  |
|                                                              |                        |      |                              |       |                        |       |                          |  |                   |  |  |
|                                                              |                        |      |                              |       |                        |       |                          |  |                   |  |  |
|                                                              |                        |      |                              |       |                        |       |                          |  |                   |  |  |
|                                                              |                        |      |                              |       |                        |       |                          |  |                   |  |  |
|                                                              |                        |      |                              |       |                        |       |                          |  |                   |  |  |
|                                                              |                        |      |                              |       |                        |       |                          |  |                   |  |  |
|                                                              |                        |      |                              |       |                        |       |                          |  |                   |  |  |
|                                                              |                        |      |                              |       |                        |       |                          |  |                   |  |  |
|                                                              |                        |      |                              |       |                        |       |                          |  |                   |  |  |
|                                                              |                        |      |                              |       |                        |       |                          |  |                   |  |  |
|                                                              |                        |      |                              |       |                        |       |                          |  |                   |  |  |

| National Cancer Institute Developmental Therapeutics Program |                        | NSC :757927/1                |                       | Units :Molar |                        | SSPL :0Y1V               |  | EXP. ID :1106NS60 |  |
|--------------------------------------------------------------|------------------------|------------------------------|-----------------------|--------------|------------------------|--------------------------|--|-------------------|--|
| Mean Graphs                                                  |                        | Report Date :August 02, 2011 |                       |              |                        | Test Date :June 06, 2011 |  |                   |  |
| Panel/Cell Line                                              | Log <sub>10</sub> GI50 | GI50                         | Log <sub>10</sub> TGI | TGI          | Log <sub>10</sub> LC50 | LC50                     |  |                   |  |
| Leukemia                                                     |                        |                              |                       |              |                        |                          |  |                   |  |
| CCRF-CEM                                                     | -6.56                  |                              |                       |              | > -4.00                |                          |  |                   |  |
| HL-60(TB)                                                    | -6.51                  |                              |                       |              | > -4.00                |                          |  |                   |  |
| K-562                                                        | -6.54                  |                              |                       |              | > -4.00                |                          |  |                   |  |
| MOLT-4                                                       | -6.55                  |                              |                       |              | > -4.00                |                          |  |                   |  |
| RPMI-8226                                                    | -6.44                  |                              |                       |              | > -4.00                |                          |  |                   |  |
| SR                                                           | -7.36                  |                              |                       |              | > -4.00                |                          |  |                   |  |
| Non-Small Cell Lung Cancer                                   |                        |                              |                       |              |                        |                          |  |                   |  |
| A549/ATCC                                                    | -6.42                  |                              |                       |              | > -4.00                |                          |  |                   |  |
| EKVX                                                         | -5.84                  |                              |                       |              | > -4.00                |                          |  |                   |  |
| HOP-62                                                       | -6.38                  |                              |                       |              | > -4.00                |                          |  |                   |  |
| HOP-92                                                       | -6.01                  |                              |                       |              | > -4.00                |                          |  |                   |  |
| NCI-H226                                                     | -5.89                  |                              |                       |              | > -4.00                |                          |  |                   |  |
| NCI-H23                                                      | -6.50                  |                              |                       |              | > -4.00                |                          |  |                   |  |
| NCI-H322M                                                    | -6.25                  |                              |                       |              | > -4.00                |                          |  |                   |  |
| NCI-H460                                                     | -6.45                  |                              |                       |              | > -4.00                |                          |  |                   |  |
| NCI-H522                                                     | -6.65                  |                              |                       |              | > -4.00                |                          |  |                   |  |
| Colon Cancer                                                 |                        |                              |                       |              |                        |                          |  |                   |  |
| COLO 205                                                     | -5.76                  |                              |                       |              | -5.23                  |                          |  |                   |  |
| HCC-2998                                                     | -6.23                  |                              |                       |              | -4.83                  |                          |  |                   |  |
| HCT-116                                                      | -6.45                  |                              |                       |              | > -4.00                |                          |  |                   |  |
| HCT-15                                                       | -6.42                  |                              |                       |              | > -4.00                |                          |  |                   |  |
| HT29                                                         | -5.88                  |                              |                       |              | > -4.00                |                          |  |                   |  |
| KM12                                                         | -6.51                  |                              |                       |              | -5.39                  |                          |  |                   |  |
| SW-620                                                       | -6.33                  |                              |                       |              | > -4.00                |                          |  |                   |  |
| CNS Cancer                                                   |                        |                              |                       |              |                        |                          |  |                   |  |
| SF-268                                                       | -6.34                  |                              |                       |              | > -4.00                |                          |  |                   |  |
| SF-295                                                       | -6.26                  |                              |                       |              | > -4.00                |                          |  |                   |  |
| SF-539                                                       | -6.34                  |                              |                       |              | > -4.00                |                          |  |                   |  |
| SNB-19                                                       | -6.17                  |                              |                       |              | > -4.00                |                          |  |                   |  |
| SNB-75                                                       | -6.42                  |                              |                       |              | > -4.00                |                          |  |                   |  |
| U251                                                         | -6.41                  |                              |                       |              | > -4.00                |                          |  |                   |  |
| Melanoma                                                     |                        |                              |                       |              |                        |                          |  |                   |  |
| LOX IMVI                                                     | -6.46                  |                              |                       |              | > -4.00                |                          |  |                   |  |
| MALME-3M                                                     | -6.21                  |                              |                       |              | > -4.00                |                          |  |                   |  |
| M14                                                          | -6.38                  |                              |                       |              | > -4.00                |                          |  |                   |  |
| MDA-MB-435                                                   | -7.10                  |                              |                       |              | > -4.00                |                          |  |                   |  |
| SK-MEL-2                                                     | -6.27                  |                              |                       |              | > -4.00                |                          |  |                   |  |
| SK-MEL-28                                                    | -6.11                  |                              |                       |              | -4.48                  |                          |  |                   |  |
| SK-MEL-5                                                     | -6.46                  |                              |                       |              | > -4.00                |                          |  |                   |  |
| UACC-257                                                     | -5.84                  |                              |                       |              | > -4.00                |                          |  |                   |  |
| UACC-62                                                      | -6.32                  |                              |                       |              | > -4.00                |                          |  |                   |  |
| Ovarian Cancer                                               |                        |                              |                       |              |                        |                          |  |                   |  |
| IGROV1                                                       | -6.28                  |                              |                       |              | > -4.00                |                          |  |                   |  |
| OVCAR-3                                                      | -6.55                  |                              |                       |              | -4.52                  |                          |  |                   |  |
| OVCAR-4                                                      | -6.23                  |                              |                       |              | -4.08                  |                          |  |                   |  |
| OVCAR-8                                                      | -6.34                  |                              |                       |              | > -4.00                |                          |  |                   |  |
| NCI/ADR-RES                                                  | -6.53                  |                              |                       |              | > -4.00                |                          |  |                   |  |
| SK-OV-3                                                      | -6.51                  |                              |                       |              | -5.08                  |                          |  |                   |  |
| Renal Cancer                                                 |                        |                              |                       |              |                        |                          |  |                   |  |
| 786-0                                                        | -6.35                  |                              |                       |              | -5.40                  |                          |  |                   |  |
| A498                                                         | -6.21                  |                              |                       |              | -5.31                  |                          |  |                   |  |
| CAKI-1                                                       | -6.42                  |                              |                       |              | > -4.00                |                          |  |                   |  |
| RXF 393                                                      | -6.64                  |                              |                       |              | -5.46                  |                          |  |                   |  |
| SN12C                                                        | -6.50                  |                              |                       |              | > -4.00                |                          |  |                   |  |
| TK-10                                                        | -6.19                  |                              |                       |              | -4.29                  |                          |  |                   |  |
| UO-31                                                        | -6.46                  |                              |                       |              | > -4.00                |                          |  |                   |  |
| Prostate Cancer                                              |                        |                              |                       |              |                        |                          |  |                   |  |
| PC-3                                                         | -6.30                  |                              |                       |              | > -4.00                |                          |  |                   |  |
| DU-145                                                       | -6.33                  |                              |                       |              | -5.36                  |                          |  |                   |  |
| Breast Cancer                                                |                        |                              |                       |              |                        |                          |  |                   |  |
| MCF7                                                         | -6.39                  |                              |                       |              | > -4.00                |                          |  |                   |  |
| MDA-MB-231/ATCC                                              | -6.13                  |                              |                       |              | > -4.00                |                          |  |                   |  |
| HS 578T                                                      | -6.46                  |                              |                       |              | > -4.00                |                          |  |                   |  |
| BT-549                                                       | -6.33                  |                              |                       |              | > -4.00                |                          |  |                   |  |
| T-47D                                                        | -6.39                  |                              |                       |              | -5.21                  |                          |  |                   |  |
| MDA-MB-468                                                   | -6.63                  |                              |                       |              | -5.08                  |                          |  |                   |  |
|                                                              |                        |                              |                       |              |                        |                          |  |                   |  |
|                                                              |                        |                              |                       |              |                        |                          |  |                   |  |
|                                                              |                        |                              |                       |              |                        |                          |  |                   |  |
|                                                              |                        |                              |                       |              |                        |                          |  |                   |  |
|                                                              |                        |                              |                       |              |                        |                          |  |                   |  |
|                                                              |                        |                              |                       |              |                        |                          |  |                   |  |
|                                                              |                        |                              |                       |              |                        |                          |  |                   |  |
|                                                              |                        |                              |                       |              |                        |                          |  |                   |  |
|                                                              |                        |                              |                       |              |                        |                          |  |                   |  |
|                                                              |                        |                              |                       |              |                        |                          |  |                   |  |
|                                                              |                        |                              |                       |              |                        |                          |  |                   |  |
|                                                              |                        |                              |                       |              |                        |                          |  |                   |  |
|                                                              |                        |                              |                       |              |                        |                          |  |                   |  |
|                                                              |                        |                              |                       |              |                        |                          |  |                   |  |
|                                                              |                        |                              |                       |              |                        |                          |  |                   |  |
|                                                              |                        |                              |                       |              |                        |                          |  |                   |  |
|                                                              |                        |                              |                       |              |                        |                          |  |                   |  |
|                                                              |                        |                              |                       |              |                        |                          |  |                   |  |
|                                                              |                        |                              |                       |              |                        |                          |  |                   |  |
|                                                              |                        |                              |                       |              |                        |                          |  |                   |  |
|                                                              |                        |                              |                       |              |                        |                          |  |                   |  |
|                                                              |                        |                              |                       |              |                        |                          |  |                   |  |
|                                                              |                        |                              |                       |              |                        |                          |  |                   |  |
|                                                              |                        |                              |                       |              |                        |                          |  |                   |  |
|                                                              |                        |                              |                       |              |                        |                          |  |                   |  |
|                                                              |                        |                              |                       |              |                        |                          |  |                   |  |
|                                                              |                        |                              |                       |              |                        |                          |  |                   |  |
|                                                              |                        |                              |                       |              |                        |                          |  |                   |  |
|                                                              |                        |                              |                       |              |                        |                          |  |                   |  |
|                                                              |                        |                              |                       |              |                        |                          |  |                   |  |
|                                                              |                        |                              |                       |              |                        |                          |  |                   |  |
|                                                              |                        |                              |                       |              |                        |                          |  |                   |  |
|                                                              |                        |                              |                       |              |                        |                          |  |                   |  |
|                                                              |                        |                              |                       |              |                        |                          |  |                   |  |
|                                                              |                        |                              |                       |              |                        |                          |  |                   |  |
|                                                              |                        |                              |                       |              |                        |                          |  |                   |  |
|                                                              |                        |                              |                       |              |                        |                          |  |                   |  |
|                                                              |                        |                              |                       |              |                        |                          |  |                   |  |
|                                                              |                        |                              |                       |              |                        |                          |  |                   |  |
|                                                              |                        |                              |                       |              |                        |                          |  |                   |  |
|                                                              |                        |                              |                       |              |                        |                          |  |                   |  |
|                                                              |                        |                              |                       |              |                        |                          |  |                   |  |
|                                                              |                        |                              |                       |              |                        |                          |  |                   |  |
|                                                              |                        |                              |                       |              |                        |                          |  |                   |  |
|                                                              |                        |                              |                       |              |                        |                          |  |                   |  |
|                                                              |                        |                              |                       |              |                        |                          |  |                   |  |
|                                                              |                        |                              |                       |              |                        |                          |  |                   |  |
|                                                              |                        |                              |                       |              |                        |                          |  |                   |  |
|                                                              |                        |                              |                       |              |                        |                          |  |                   |  |
|                                                              |                        |                              |                       |              |                        |                          |  |                   |  |
|                                                              |                        |                              |                       |              |                        |                          |  |                   |  |
|                                                              |                        |                              |                       |              |                        |                          |  |                   |  |
|                                                              |                        |                              |                       |              |                        |                          |  |                   |  |
|                                                              |                        |                              |                       |              |                        |                          |  |                   |  |
|                                                              |                        |                              |                       |              |                        |                          |  |                   |  |
|                                                              |                        |                              |                       |              |                        |                          |  |                   |  |
|                                                              |                        |                              |                       |              |                        |                          |  |                   |  |
|                                                              |                        |                              |                       |              |                        |                          |  |                   |  |
|                                                              |                        |                              |                       |              |                        |                          |  |                   |  |
|                                                              |                        |                              |                       |              |                        |                          |  |                   |  |
|                                                              |                        |                              |                       |              |                        |                          |  |                   |  |
|                                                              |                        |                              |                       |              |                        |                          |  |                   |  |
|                                                              |                        |                              |                       |              |                        |                          |  |                   |  |
|                                                              |                        |                              |                       |              |                        |                          |  |                   |  |
|                                                              |                        |                              |                       |              |                        |                          |  |                   |  |
|                                                              |                        |                              |                       |              |                        |                          |  |                   |  |
|                                                              |                        |                              |                       |              |                        |                          |  |                   |  |
|                                                              |                        |                              |                       |              |                        |                          |  |                   |  |
|                                                              |                        |                              |                       |              |                        |                          |  |                   |  |
|                                                              |                        |                              |                       |              |                        |                          |  |                   |  |
|                                                              |                        |                              |                       |              |                        |                          |  |                   |  |
|                                                              |                        |                              |                       |              |                        |                          |  |                   |  |
|                                                              |                        |                              |                       |              |                        |                          |  |                   |  |
|                                                              |                        |                              |                       |              |                        |                          |  |                   |  |
|                                                              |                        |                              |                       |              |                        |                          |  |                   |  |

|                                                              |                        |      |                       |                             |                        |              |  |            |  |                              |  |
|--------------------------------------------------------------|------------------------|------|-----------------------|-----------------------------|------------------------|--------------|--|------------|--|------------------------------|--|
| National Cancer Institute Developmental Therapeutics Program |                        |      |                       | NSC :763373/1               |                        | Units :Molar |  | SSPL :0Y1V |  | EXP. ID :1202NS13            |  |
| Mean Graphs                                                  |                        |      |                       | Report Date :April 25, 2012 |                        |              |  |            |  | Test Date :February 21, 2012 |  |
| Panel/Cell Line                                              | Log <sub>10</sub> GI50 | GI50 | Log <sub>10</sub> TGI | TGI                         | Log <sub>10</sub> LC50 | LC50         |  |            |  |                              |  |
| Leukemia                                                     |                        |      |                       |                             |                        |              |  |            |  |                              |  |
| CCRF-CEM                                                     | -6.57                  |      |                       |                             | > -4.00                |              |  |            |  |                              |  |
| HL-60(TB)                                                    | -6.58                  |      | -6.10                 |                             | > -4.00                |              |  |            |  |                              |  |
| K-562                                                        | -6.49                  |      | -5.81                 |                             | > -4.00                |              |  |            |  |                              |  |
| MOLT-4                                                       | -6.56                  |      | -5.97                 |                             | > -4.00                |              |  |            |  |                              |  |
| RPMI-8226                                                    | -6.60                  |      | -6.19                 |                             | > -4.00                |              |  |            |  |                              |  |
| SR                                                           | -7.57                  |      | -6.82                 |                             | > -4.00                |              |  |            |  |                              |  |
| Non-Small Cell Lung Cancer                                   |                        |      |                       |                             |                        |              |  |            |  |                              |  |
| A549/ATCC                                                    | -6.38                  |      | -5.43                 |                             | > -4.35                |              |  |            |  |                              |  |
| EKVX                                                         | -6.00                  |      | -5.30                 |                             | > -4.00                |              |  |            |  |                              |  |
| HOP-62                                                       | -6.13                  |      | -5.66                 |                             | > -5.26                |              |  |            |  |                              |  |
| HOP-92                                                       | -6.21                  |      | -5.49                 |                             | > -4.20                |              |  |            |  |                              |  |
| NCI-H226                                                     | -5.99                  |      | -5.35                 |                             | > -4.00                |              |  |            |  |                              |  |
| NCI-H23                                                      | -6.42                  |      |                       |                             | > -4.00                |              |  |            |  |                              |  |
| NCI-H322M                                                    | -6.30                  |      | -5.33                 |                             | > -4.07                |              |  |            |  |                              |  |
| NCI-H460                                                     | -6.48                  |      | -5.84                 |                             | > -4.39                |              |  |            |  |                              |  |
| NCI-H522                                                     | -6.76                  |      | -6.22                 |                             | > -5.32                |              |  |            |  |                              |  |
| Colon Cancer                                                 |                        |      |                       |                             |                        |              |  |            |  |                              |  |
| COLO 205                                                     | -5.74                  |      | -5.48                 |                             | > -5.23                |              |  |            |  |                              |  |
| HCC-2998                                                     | -5.65                  |      | -5.03                 |                             | > -4.42                |              |  |            |  |                              |  |
| HCT-116                                                      | -6.57                  |      | -5.95                 |                             | > -4.00                |              |  |            |  |                              |  |
| HCT-15                                                       | -6.40                  |      | -4.96                 |                             | > -4.00                |              |  |            |  |                              |  |
| HT29                                                         | -5.83                  |      | -5.43                 |                             | > -5.03                |              |  |            |  |                              |  |
| KM12                                                         | -6.52                  |      | -5.82                 |                             | > -4.86                |              |  |            |  |                              |  |
| SW-620                                                       | -6.32                  |      | -5.45                 |                             | > -4.19                |              |  |            |  |                              |  |
| CNS Cancer                                                   |                        |      |                       |                             |                        |              |  |            |  |                              |  |
| SF-268                                                       | -6.30                  |      | -5.29                 |                             | > -4.12                |              |  |            |  |                              |  |
| SF-295                                                       | -5.70                  |      | -5.10                 |                             | > -4.00                |              |  |            |  |                              |  |
| SF-539                                                       | -6.26                  |      | -5.44                 |                             | > -4.00                |              |  |            |  |                              |  |
| SNB-19                                                       | -5.99                  |      | -5.06                 |                             | > -4.43                |              |  |            |  |                              |  |
| SNB-75                                                       | -6.51                  |      | -5.99                 |                             | > -5.26                |              |  |            |  |                              |  |
| U251                                                         | -6.35                  |      | -5.44                 |                             | > -4.14                |              |  |            |  |                              |  |
| Melanoma                                                     |                        |      |                       |                             |                        |              |  |            |  |                              |  |
| LOX IMVI                                                     | -6.35                  |      | -5.72                 |                             | > -4.00                |              |  |            |  |                              |  |
| MALME-3M                                                     | -5.98                  |      | -5.44                 |                             | > -5.24                |              |  |            |  |                              |  |
| M14                                                          | -6.58                  |      | -5.95                 |                             | > -4.00                |              |  |            |  |                              |  |
| MDA-MB-435                                                   | -7.13                  |      | -6.45                 |                             | > -4.49                |              |  |            |  |                              |  |
| SK-MEL-28                                                    | -6.16                  |      | -5.23                 |                             | > -5.41                |              |  |            |  |                              |  |
| SK-MEL-5                                                     | -6.53                  |      | -5.91                 |                             | > -4.32                |              |  |            |  |                              |  |
| UACC-257                                                     | -6.09                  |      | -5.35                 |                             | > -4.00                |              |  |            |  |                              |  |
| UACC-62                                                      | -6.34                  |      | -5.65                 |                             | > -4.00                |              |  |            |  |                              |  |
| Ovarian Cancer                                               |                        |      |                       |                             |                        |              |  |            |  |                              |  |
| IGROV1                                                       | -6.25                  |      | -5.50                 |                             | > -4.00                |              |  |            |  |                              |  |
| OVCAR-3                                                      | -6.46                  |      | -5.84                 |                             | > -5.03                |              |  |            |  |                              |  |
| OVCAR-4                                                      | -6.16                  |      | -5.23                 |                             | > -4.27                |              |  |            |  |                              |  |
| OVCAR-5                                                      | -5.57                  |      | -5.17                 |                             | > -4.00                |              |  |            |  |                              |  |
| OVCAR-8                                                      | -6.33                  |      | -5.58                 |                             | > -4.23                |              |  |            |  |                              |  |
| NCI/ADR-RES                                                  | -6.40                  |      |                       |                             | > -4.00                |              |  |            |  |                              |  |
| SK-OV-3                                                      | -6.42                  |      | -5.84                 |                             | > -5.23                |              |  |            |  |                              |  |
| Renal Cancer                                                 |                        |      |                       |                             |                        |              |  |            |  |                              |  |
| 786-0                                                        | -6.42                  |      | -5.71                 |                             | > -5.19                |              |  |            |  |                              |  |
| A498                                                         | -5.92                  |      | -5.36                 |                             | > -4.74                |              |  |            |  |                              |  |
| ACHN                                                         | -6.39                  |      | -4.92                 |                             | > -4.00                |              |  |            |  |                              |  |
| CAKI-1                                                       | -6.41                  |      | -5.33                 |                             | > -4.00                |              |  |            |  |                              |  |
| RXF 393                                                      | -6.46                  |      | -5.95                 |                             | > -5.35                |              |  |            |  |                              |  |
| SN12C                                                        | -6.35                  |      | > -4.00               |                             | > -4.00                |              |  |            |  |                              |  |
| TK-10                                                        | -6.21                  |      | -5.36                 |                             | > -4.46                |              |  |            |  |                              |  |
| UO-31                                                        | -6.59                  |      | -5.84                 |                             | > -4.00                |              |  |            |  |                              |  |
| Prostate Cancer                                              |                        |      |                       |                             |                        |              |  |            |  |                              |  |
| PC-3                                                         | -6.44                  |      | -5.73                 |                             | > -4.47                |              |  |            |  |                              |  |
| DU-145                                                       | -6.38                  |      | -5.68                 |                             | > -4.89                |              |  |            |  |                              |  |
| Breast Cancer                                                |                        |      |                       |                             |                        |              |  |            |  |                              |  |
| MCF7                                                         | -6.39                  |      | -5.67                 |                             | > -4.71                |              |  |            |  |                              |  |
| MDA-MB-231/ATCC                                              | -5.92                  |      | -4.57                 |                             | > -4.00                |              |  |            |  |                              |  |
| HS 578T                                                      | -6.56                  |      | -6.16                 |                             | > -4.00                |              |  |            |  |                              |  |
| BT-549                                                       | -6.51                  |      | -5.63                 |                             | > -4.00                |              |  |            |  |                              |  |
| T-47D                                                        | -6.00                  |      | -5.60                 |                             | > -5.20                |              |  |            |  |                              |  |
|                                                              |                        |      |                       |                             |                        |              |  |            |  |                              |  |
| MID                                                          | -6.33                  |      | -5.57                 |                             | -4.41                  |              |  |            |  |                              |  |
| Delta                                                        | 1.24                   |      | 1.25                  |                             | 1                      |              |  |            |  |                              |  |
| Range                                                        | 2.0                    |      | 2.82                  |                             | 1.41                   |              |  |            |  |                              |  |
|                                                              |                        |      |                       |                             |                        |              |  |            |  |                              |  |

| National Cancer Institute Developmental Therapeutics Program                                                                                                                                                                                                                                                                                                                           |                        | NSC :757928/1                |                       | Units :Molar |                        | SSPL :0Y1V               |  | EXP. ID :1106NS60 |  |
|----------------------------------------------------------------------------------------------------------------------------------------------------------------------------------------------------------------------------------------------------------------------------------------------------------------------------------------------------------------------------------------|------------------------|------------------------------|-----------------------|--------------|------------------------|--------------------------|--|-------------------|--|
| Mean Graphs                                                                                                                                                                                                                                                                                                                                                                            |                        | Report Date :August 02, 2011 |                       |              |                        | Test Date :June 06, 2011 |  |                   |  |
| Panel/Cell Line                                                                                                                                                                                                                                                                                                                                                                        | Log <sub>10</sub> GI50 | GI50                         | Log <sub>10</sub> TGI | TGI          | Log <sub>10</sub> LC50 | LC50                     |  |                   |  |
| Leukemia                                                                                                                                                                                                                                                                                                                                                                               |                        |                              |                       |              |                        |                          |  |                   |  |
| CCRF-CEM                                                                                                                                                                                                                                                                                                                                                                               | -6.08                  |                              | -5.21                 |              | > -4.00                |                          |  |                   |  |
| HL-60(TB)                                                                                                                                                                                                                                                                                                                                                                              | -5.68                  |                              | -5.22                 |              | > -4.00                |                          |  |                   |  |
| K-562                                                                                                                                                                                                                                                                                                                                                                                  | -5.84                  |                              | > -4.00               |              | > -4.00                |                          |  |                   |  |
| MOLT-4                                                                                                                                                                                                                                                                                                                                                                                 | -5.91                  |                              | > -4.00               |              | > -4.00                |                          |  |                   |  |
| RPMI-8226                                                                                                                                                                                                                                                                                                                                                                              | -5.69                  |                              | -5.22                 |              | > -4.00                |                          |  |                   |  |
| SR                                                                                                                                                                                                                                                                                                                                                                                     | -6.47                  |                              |                       |              | > -4.00                |                          |  |                   |  |
| Non-Small Cell Lung Cancer                                                                                                                                                                                                                                                                                                                                                             |                        |                              |                       |              |                        |                          |  |                   |  |
| A549/ATCC                                                                                                                                                                                                                                                                                                                                                                              | -5.52                  |                              | -4.34                 |              | > -4.00                |                          |  |                   |  |
| EKVX                                                                                                                                                                                                                                                                                                                                                                                   | -5.33                  |                              | > -4.00               |              | > -4.00                |                          |  |                   |  |
| HOP-62                                                                                                                                                                                                                                                                                                                                                                                 | -5.47                  |                              | -4.79                 |              | > -4.00                |                          |  |                   |  |
| HOP-92                                                                                                                                                                                                                                                                                                                                                                                 | -5.42                  |                              | -5.02                 |              | > -4.00                |                          |  |                   |  |
| NCI-H226                                                                                                                                                                                                                                                                                                                                                                               | -5.48                  |                              | -4.25                 |              | > -4.00                |                          |  |                   |  |
| NCI-H23                                                                                                                                                                                                                                                                                                                                                                                | -5.57                  |                              | -4.77                 |              | > -4.00                |                          |  |                   |  |
| NCI-H322M                                                                                                                                                                                                                                                                                                                                                                              | -5.46                  |                              | -4.40                 |              | > -4.00                |                          |  |                   |  |
| NCI-H460                                                                                                                                                                                                                                                                                                                                                                               | -5.52                  |                              | > -4.00               |              | > -4.00                |                          |  |                   |  |
| NCI-H522                                                                                                                                                                                                                                                                                                                                                                               | -5.86                  |                              | -5.20                 |              | > -4.00                |                          |  |                   |  |
| Colon Cancer                                                                                                                                                                                                                                                                                                                                                                           |                        |                              |                       |              |                        |                          |  |                   |  |
| COLO 205                                                                                                                                                                                                                                                                                                                                                                               | -5.64                  |                              | -5.33                 |              | -5.03                  |                          |  |                   |  |
| HCC-2998                                                                                                                                                                                                                                                                                                                                                                               | -5.61                  |                              | -5.20                 |              | > -4.00                |                          |  |                   |  |
| HCT-116                                                                                                                                                                                                                                                                                                                                                                                | -5.51                  |                              | > -4.00               |              | > -4.00                |                          |  |                   |  |
| HCT-15                                                                                                                                                                                                                                                                                                                                                                                 | -5.55                  |                              | > -4.00               |              | > -4.00                |                          |  |                   |  |
| HT29                                                                                                                                                                                                                                                                                                                                                                                   | -5.62                  |                              |                       |              | > -4.00                |                          |  |                   |  |
| KM12                                                                                                                                                                                                                                                                                                                                                                                   | -5.65                  |                              | > -4.00               |              | > -4.00                |                          |  |                   |  |
| SW-620                                                                                                                                                                                                                                                                                                                                                                                 | -5.44                  |                              | > -4.00               |              | > -4.00                |                          |  |                   |  |
| CNS Cancer                                                                                                                                                                                                                                                                                                                                                                             |                        |                              |                       |              |                        |                          |  |                   |  |
| SF-268                                                                                                                                                                                                                                                                                                                                                                                 | -5.61                  |                              | > -4.00               |              | > -4.00                |                          |  |                   |  |
| SF-295                                                                                                                                                                                                                                                                                                                                                                                 | -5.51                  |                              | -4.46                 |              | > -4.00                |                          |  |                   |  |
| SF-539                                                                                                                                                                                                                                                                                                                                                                                 | -5.59                  |                              |                       |              | > -4.00                |                          |  |                   |  |
| SNB-19                                                                                                                                                                                                                                                                                                                                                                                 | -5.57                  |                              | > -4.00               |              | > -4.00                |                          |  |                   |  |
| SNB-75                                                                                                                                                                                                                                                                                                                                                                                 | -5.55                  |                              | -4.81                 |              | > -4.00                |                          |  |                   |  |
| U251                                                                                                                                                                                                                                                                                                                                                                                   | -5.58                  |                              | > -4.00               |              | > -4.00                |                          |  |                   |  |
| Melanoma                                                                                                                                                                                                                                                                                                                                                                               |                        |                              |                       |              |                        |                          |  |                   |  |
| LOX IMVI                                                                                                                                                                                                                                                                                                                                                                               | -5.61                  |                              |                       |              | > -4.00                |                          |  |                   |  |
| MALME-3M                                                                                                                                                                                                                                                                                                                                                                               | -5.49                  |                              | -4.36                 |              | > -4.00                |                          |  |                   |  |
| M14                                                                                                                                                                                                                                                                                                                                                                                    | -5.51                  |                              | > -4.00               |              | > -4.00                |                          |  |                   |  |
| MDA-MB-435                                                                                                                                                                                                                                                                                                                                                                             | -5.16                  |                              | -5.09                 |              | > -4.00                |                          |  |                   |  |
| SK-MEL-2                                                                                                                                                                                                                                                                                                                                                                               | -5.63                  |                              | -5.23                 |              | > -4.00                |                          |  |                   |  |
| SK-MEL-28                                                                                                                                                                                                                                                                                                                                                                              | -5.59                  |                              | -5.06                 |              | > -4.00                |                          |  |                   |  |
| SK-MEL-5                                                                                                                                                                                                                                                                                                                                                                               | -5.59                  |                              | -4.88                 |              | > -4.00                |                          |  |                   |  |
| UACC-257                                                                                                                                                                                                                                                                                                                                                                               | -5.47                  |                              | -4.40                 |              | > -4.00                |                          |  |                   |  |
| UACC-62                                                                                                                                                                                                                                                                                                                                                                                | -5.58                  |                              | -5.06                 |              | > -4.00                |                          |  |                   |  |
| Ovarian Cancer                                                                                                                                                                                                                                                                                                                                                                         |                        |                              |                       |              |                        |                          |  |                   |  |
| IGROV1                                                                                                                                                                                                                                                                                                                                                                                 | -5.39                  |                              | > -4.00               |              | > -4.00                |                          |  |                   |  |
| OVCAR-3                                                                                                                                                                                                                                                                                                                                                                                | -5.60                  |                              |                       |              | > -4.00                |                          |  |                   |  |
| OVCAR-4                                                                                                                                                                                                                                                                                                                                                                                | -5.44                  |                              | -4.64                 |              | > -4.00                |                          |  |                   |  |
| OVCAR-8                                                                                                                                                                                                                                                                                                                                                                                | -5.56                  |                              | -4.91                 |              | > -4.00                |                          |  |                   |  |
| NCI/ADR-RES                                                                                                                                                                                                                                                                                                                                                                            | -5.43                  |                              | > -4.00               |              | > -4.00                |                          |  |                   |  |
| SK-OV-3                                                                                                                                                                                                                                                                                                                                                                                | -5.65                  |                              | -5.28                 |              | > -4.00                |                          |  |                   |  |
| Renal Cancer                                                                                                                                                                                                                                                                                                                                                                           |                        |                              |                       |              |                        |                          |  |                   |  |
| 786-0                                                                                                                                                                                                                                                                                                                                                                                  | -5.50                  |                              | > -4.00               |              | > -4.00                |                          |  |                   |  |
| A498                                                                                                                                                                                                                                                                                                                                                                                   | -5.52                  |                              | -5.06                 |              | > -4.00                |                          |  |                   |  |
| CAKI-1                                                                                                                                                                                                                                                                                                                                                                                 | -5.66                  |                              | > -4.00               |              | > -4.00                |                          |  |                   |  |
| RXF 393                                                                                                                                                                                                                                                                                                                                                                                | -5.78                  |                              | -5.40                 |              | > -4.00                |                          |  |                   |  |
| SN12C                                                                                                                                                                                                                                                                                                                                                                                  | -5.65                  |                              | > -4.00               |              | > -4.00                |                          |  |                   |  |
| TK-10                                                                                                                                                                                                                                                                                                                                                                                  | -5.41                  |                              | -4.48                 |              | > -4.00                |                          |  |                   |  |
| UO-31                                                                                                                                                                                                                                                                                                                                                                                  | -5.63                  |                              | -4.47                 |              | > -4.00                |                          |  |                   |  |
| Prostate Cancer                                                                                                                                                                                                                                                                                                                                                                        |                        |                              |                       |              |                        |                          |  |                   |  |
| PC-3                                                                                                                                                                                                                                                                                                                                                                                   | -5.52                  |                              | -4.17                 |              | > -4.00                |                          |  |                   |  |
| DU-145                                                                                                                                                                                                                                                                                                                                                                                 | -5.48                  |                              | -4.46                 |              | > -4.00                |                          |  |                   |  |
| Breast Cancer                                                                                                                                                                                                                                                                                                                                                                          |                        |                              |                       |              |                        |                          |  |                   |  |
| MCF7                                                                                                                                                                                                                                                                                                                                                                                   | -5.52                  |                              | -4.89                 |              | > -4.00                |                          |  |                   |  |
| MDA-MB-231/ATCC                                                                                                                                                                                                                                                                                                                                                                        | -5.44                  |                              | > -4.00               |              | > -4.00                |                          |  |                   |  |
| HS 578T                                                                                                                                                                                                                                                                                                                                                                                | -5.56                  |                              | -4.31                 |              | > -4.00                |                          |  |                   |  |
| BT-549                                                                                                                                                                                                                                                                                                                                                                                 | -5.67                  |                              | -5.11                 |              | > -4.00                |                          |  |                   |  |
| T-47D                                                                                                                                                                                                                                                                                                                                                                                  | -5.53                  |                              | -4.88                 |              | -4.02                  |                          |  |                   |  |
| MDA-MB-468                                                                                                                                                                                                                                                                                                                                                                             | -5.65                  |                              | -5.24                 |              | > -4.00                |                          |  |                   |  |
|                                                                                                                                                                                                                                                                                                                                                                                        |                        |                              |                       |              |                        |                          |  |                   |  |
| MID                                                                                                                                                                                                                                                                                                                                                                                    | -5.6                   |                              | -4.56                 |              | -4.02                  |                          |  |                   |  |
| Delta                                                                                                                                                                                                                                                                                                                                                                                  | 0.87                   |                              | 0.84                  |              | 1.01                   |                          |  |                   |  |
| Range                                                                                                                                                                                                                                                                                                                                                                                  | 1.14                   |                              | 1.4                   |              | 1.03                   |                          |  |                   |  |
| <div><div><div></div><div></div><div></div><div></div><div></div><div></div><div></div><div></div><div></div><div></div></div><div><div></div><div></div><div></div><div></div><div></div><div></div><div></div><div></div><div></div><div></div></div><div><div></div><div></div><div></div><div></div><div></div><div></div><div></div><div></div><div></div><div></div></div></div> |                        |                              |                       |              |                        |                          |  |                   |  |

| National Cancer Institute Developmental Therapeutics Program |                        |      | NSC :763374/1               |     | Units :Molar           |      | SSPL :0Y1V                   |  | EXP. ID :1202NS13 |  |
|--------------------------------------------------------------|------------------------|------|-----------------------------|-----|------------------------|------|------------------------------|--|-------------------|--|
| Mean Graphs                                                  |                        |      | Report Date :April 25, 2012 |     |                        |      | Test Date :February 21, 2012 |  |                   |  |
| Panel/Cell Line                                              | Log <sub>10</sub> GI50 | GI50 | Log <sub>10</sub> TGI       | TGI | Log <sub>10</sub> LC50 | LC50 |                              |  |                   |  |
| Leukemia                                                     |                        |      |                             |     |                        |      |                              |  |                   |  |
| CCRF-CEM                                                     | -5.68                  |      | -5.21                       |     | > -4.00                |      |                              |  |                   |  |
| HL-60(TB)                                                    | -5.43                  |      | -4.92                       |     | > -4.00                |      |                              |  |                   |  |
| K-562                                                        | -5.44                  |      | -4.45                       |     | > -4.00                |      |                              |  |                   |  |
| MOLT-4                                                       | -5.59                  |      | -4.93                       |     | > -4.00                |      |                              |  |                   |  |
| RPMI-8226                                                    | -5.68                  |      | -5.25                       |     | > -4.00                |      |                              |  |                   |  |
| SR                                                           | -5.72                  |      | -5.21                       |     | > -4.00                |      |                              |  |                   |  |
| Non-Small Cell Lung Cancer                                   |                        |      |                             |     |                        |      |                              |  |                   |  |
| A549/ATCC                                                    | -5.28                  |      | -4.56                       |     | > -4.00                |      |                              |  |                   |  |
| EKVX                                                         | -5.41                  |      | -4.14                       |     | > -4.00                |      |                              |  |                   |  |
| HOP-62                                                       | -5.39                  |      | -4.76                       |     | > -4.09                |      |                              |  |                   |  |
| HOP-92                                                       | -5.64                  |      | -5.03                       |     | > -4.00                |      |                              |  |                   |  |
| NCI-H226                                                     | -5.46                  |      | -4.65                       |     | > -4.00                |      |                              |  |                   |  |
| NCI-H23                                                      | -5.63                  |      |                             |     | > -4.00                |      |                              |  |                   |  |
| NCI-H322M                                                    | -5.33                  |      | -4.09                       |     | > -4.00                |      |                              |  |                   |  |
| NCI-H460                                                     | -5.51                  |      | -4.73                       |     | > -4.00                |      |                              |  |                   |  |
| NCI-H522                                                     | -5.59                  |      | -5.10                       |     | > -4.00                |      |                              |  |                   |  |
| Colon Cancer                                                 |                        |      |                             |     |                        |      |                              |  |                   |  |
| COLO 205                                                     | -5.69                  |      | -5.40                       |     | -5.10                  |      |                              |  |                   |  |
| HCC-2998                                                     | -5.45                  |      | -4.85                       |     | -4.03                  |      |                              |  |                   |  |
| HCT-116                                                      | -5.61                  |      | -4.91                       |     | > -4.00                |      |                              |  |                   |  |
| HCT-15                                                       | -5.26                  |      | -4.00                       |     | > -4.00                |      |                              |  |                   |  |
| HT29                                                         | -5.89                  |      | -5.57                       |     | -5.26                  |      |                              |  |                   |  |
| KM12                                                         | -5.46                  |      | -4.85                       |     | > -4.00                |      |                              |  |                   |  |
| SW-620                                                       | -5.50                  |      | -4.78                       |     | > -4.00                |      |                              |  |                   |  |
| CNS Cancer                                                   |                        |      |                             |     |                        |      |                              |  |                   |  |
| SF-268                                                       | -5.34                  |      | > -4.00                     |     | > -4.00                |      |                              |  |                   |  |
| SF-295                                                       | -5.56                  |      | -5.01                       |     | > -4.00                |      |                              |  |                   |  |
| SF-539                                                       | -5.41                  |      | > -4.00                     |     | > -4.00                |      |                              |  |                   |  |
| SNB-19                                                       | -5.47                  |      | > -4.00                     |     | > -4.00                |      |                              |  |                   |  |
| SNB-75                                                       | -5.77                  |      | -4.92                       |     | > -4.00                |      |                              |  |                   |  |
| U251                                                         | -5.50                  |      | -4.87                       |     | -4.18                  |      |                              |  |                   |  |
| Melanoma                                                     |                        |      |                             |     |                        |      |                              |  |                   |  |
| LOX IMVI                                                     | -5.50                  |      | > -4.00                     |     | > -4.00                |      |                              |  |                   |  |
| MALME-3M                                                     | -5.41                  |      | > -4.00                     |     | > -4.00                |      |                              |  |                   |  |
| M14                                                          | -5.51                  |      | -4.81                       |     | > -4.00                |      |                              |  |                   |  |
| MDA-MB-435                                                   | -5.57                  |      | -4.74                       |     | > -4.00                |      |                              |  |                   |  |
| SK-MEL-2                                                     | -5.54                  |      | -5.17                       |     | > -4.00                |      |                              |  |                   |  |
| SK-MEL-28                                                    | -5.52                  |      | -4.88                       |     | -4.04                  |      |                              |  |                   |  |
| SK-MEL-5                                                     | -5.43                  |      | -4.44                       |     | > -4.00                |      |                              |  |                   |  |
| UACC-257                                                     | -5.47                  |      | -4.75                       |     | > -4.00                |      |                              |  |                   |  |
| UACC-62                                                      | -5.47                  |      | -4.36                       |     | > -4.00                |      |                              |  |                   |  |
| Ovarian Cancer                                               |                        |      |                             |     |                        |      |                              |  |                   |  |
| IGROV1                                                       | -5.36                  |      | > -4.00                     |     | > -4.00                |      |                              |  |                   |  |
| OVCAR-3                                                      | -5.42                  |      | -4.48                       |     | > -4.00                |      |                              |  |                   |  |
| OVCAR-4                                                      | -5.61                  |      | -4.77                       |     | > -4.00                |      |                              |  |                   |  |
| OVCAR-5                                                      | -5.00                  |      | -4.55                       |     | -4.10                  |      |                              |  |                   |  |
| OVCAR-8                                                      | -5.32                  |      | -4.90                       |     | > -4.00                |      |                              |  |                   |  |
| NCI/ADR-RES                                                  | -4.78                  |      | > -4.00                     |     | > -4.00                |      |                              |  |                   |  |
| SK-OV-3                                                      | -5.63                  |      | -5.31                       |     | > -4.00                |      |                              |  |                   |  |
| Renal Cancer                                                 |                        |      |                             |     |                        |      |                              |  |                   |  |
| 786-0                                                        | -5.56                  |      | -4.48                       |     | > -4.00                |      |                              |  |                   |  |
| A498                                                         | -5.51                  |      | -4.60                       |     | > -4.00                |      |                              |  |                   |  |
| ACHN                                                         | -5.05                  |      | > -4.00                     |     | > -4.00                |      |                              |  |                   |  |
| CAKI-1                                                       | -5.47                  |      | > -4.00                     |     | > -4.00                |      |                              |  |                   |  |
| RXP 393                                                      | -5.65                  |      | -5.31                       |     | -4.56                  |      |                              |  |                   |  |
| SN12C                                                        | -5.36                  |      | > -4.00                     |     | > -4.00                |      |                              |  |                   |  |
| TK-10                                                        | -5.21                  |      | -4.44                       |     | > -4.00                |      |                              |  |                   |  |
| UO-31                                                        | -5.43                  |      | -4.23                       |     | > -4.00                |      |                              |  |                   |  |
| Prostate Cancer                                              |                        |      |                             |     |                        |      |                              |  |                   |  |
| PC-3                                                         | -5.49                  |      | -4.73                       |     | > -4.00                |      |                              |  |                   |  |
| DU-145                                                       | -5.31                  |      | -4.45                       |     | > -4.00                |      |                              |  |                   |  |
| Breast Cancer                                                |                        |      |                             |     |                        |      |                              |  |                   |  |
| MCF7                                                         | -5.53                  |      | -4.94                       |     | -4.18                  |      |                              |  |                   |  |
| MDA-MB-231/ATCC                                              | -5.45                  |      | > -4.00                     |     | > -4.00                |      |                              |  |                   |  |
| HS 578T                                                      | -5.74                  |      | -5.17                       |     | > -4.00                |      |                              |  |                   |  |
| BT-549                                                       | -5.69                  |      | -5.09                       |     | > -4.00                |      |                              |  |                   |  |
| T-47D                                                        | -5.19                  |      | -4.43                       |     | > -4.00                |      |                              |  |                   |  |
| MID                                                          | -5.48                  |      | -4.64                       |     | -4.06                  |      |                              |  |                   |  |
| Delta                                                        | 0.41                   |      | 0.93                        |     | 1.2                    |      |                              |  |                   |  |
| Range                                                        | 1.11                   |      | 1.57                        |     | 1.26                   |      |                              |  |                   |  |
